# Supplementary material for: Local frustration determines loop opening during the catalytic cycle of an oxidoreductase
Source: eLife journal article supplement (doi:10.7554/elife.54661), 2020-06-22
Supplement: supp [file elife-54661-supp-v1.zip]

Archive with 21 entries (21 files):
- elife_poa_e54661_Figure_2_figure_supplement_1.pdf
- elife_poa_e54661_Figure_2_figure_supplement_2.pdf
- elife_poa_e54661_Figure_2_figure_supplement_3.pdf
- elife_poa_e54661_Figure_2_source_data_1.docx
- elife_poa_e54661_Figure_2_source_data_2.docx
- elife_poa_e54661_Figure_3_figure_supplement_1.pdf
- elife_poa_e54661_Figure_3_figure_supplement_2.pdf
- elife_poa_e54661_Figure_4_figure_supplement_1.pdf
- elife_poa_e54661_Figure_4_figure_supplement_2.pdf
- elife_poa_e54661_Figure_5_figure_supplement_1.pdf
- elife_poa_e54661_Figure_5_figure_supplement_2.pdf
- elife_poa_e54661_Figure_5_figure_supplement_3.pdf
- elife_poa_e54661_Figure_5_figure_supplement_4.pdf
- elife_poa_e54661_Figure_5_figure_supplement_5.pdf
- elife_poa_e54661_Figure_5_figure_supplement_6.pdf
- elife_poa_e54661_Figure_6_figure_supplement_1.pdf
- elife_poa_e54661_Figure_6_figure_supplement_2.pdf
- elife_poa_e54661_Figure_6_source_data_1.docx
- elife_poa_e54661_Figure_6_source_data_2.docx
- elife_poa_e54661_Figure_7_source_data_1.docx
- elife_poa_e54661_Transparent_Reporting_File.docx
