# Supplementary material for: Local frustration determines loop opening during the catalytic cycle of an oxidoreductase
Source: eLife journal article supplement (doi:10.7554/elife.54661), 2020-06-22
Supplement: supp [file elife-54661-supp-v1.zip › elife_poa_e54661_Figure_5_figure_supplement_6.pdf]

Figure 5 – figure supplement 6
