# Supplementary figures and images for: Local frustration determines loop opening during the catalytic cycle of an oxidoreductase
Source: eLife journal article supplement (doi:10.7554/elife.54661), 2020-06-22

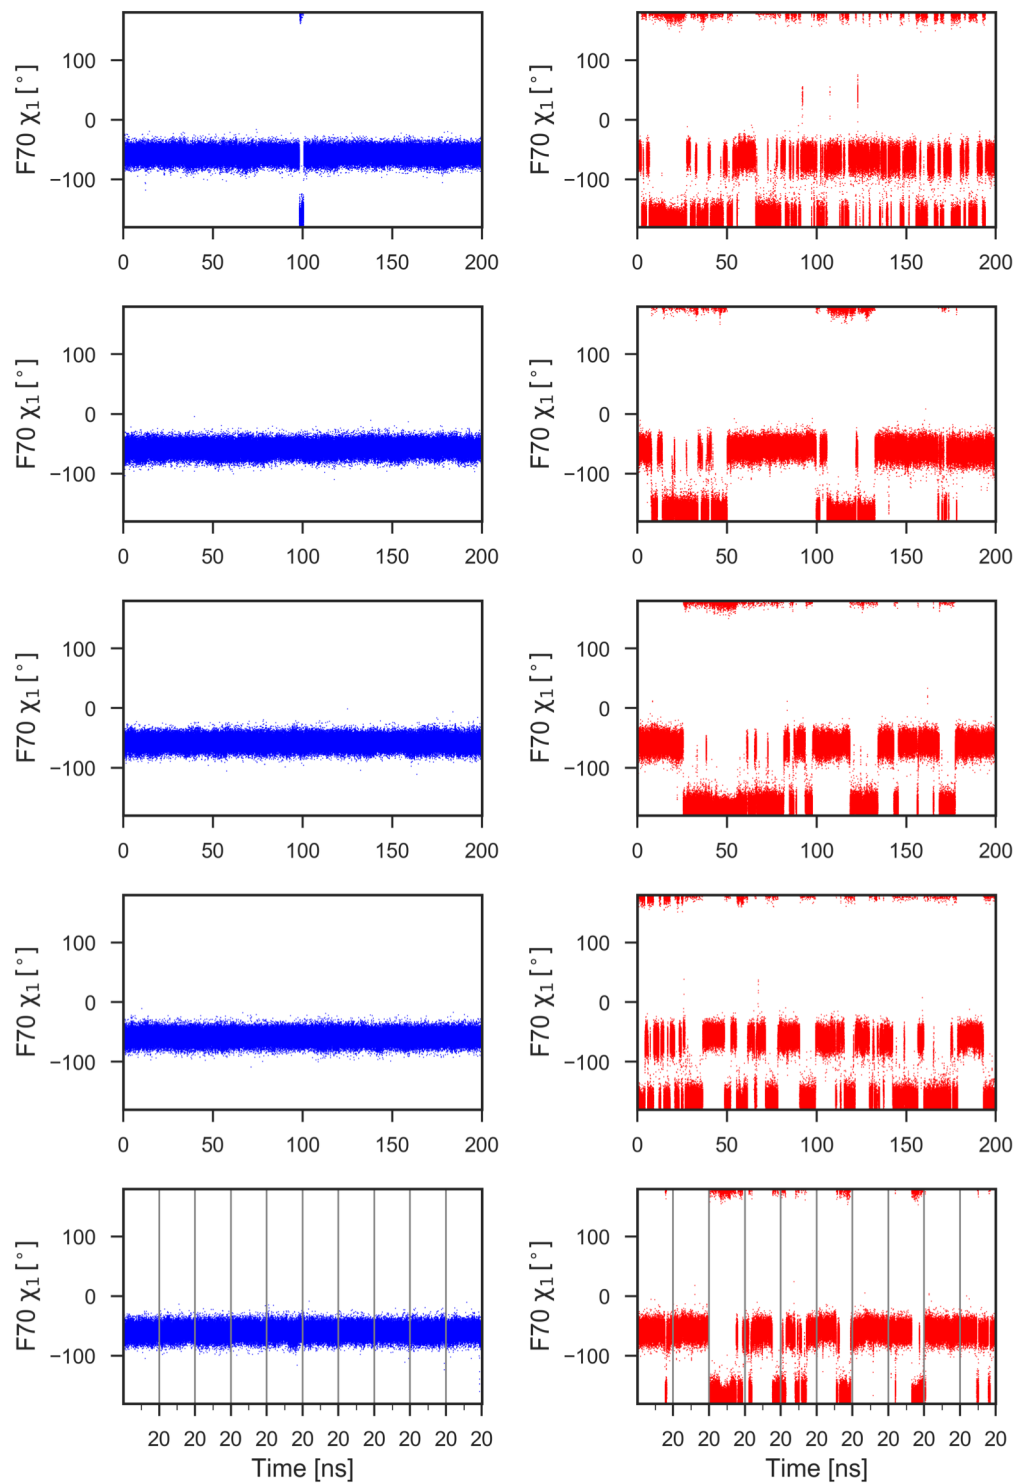

Figure 4 – figure supplement 1

Supplement: supp [file elife-54661-supp-v1.zip]

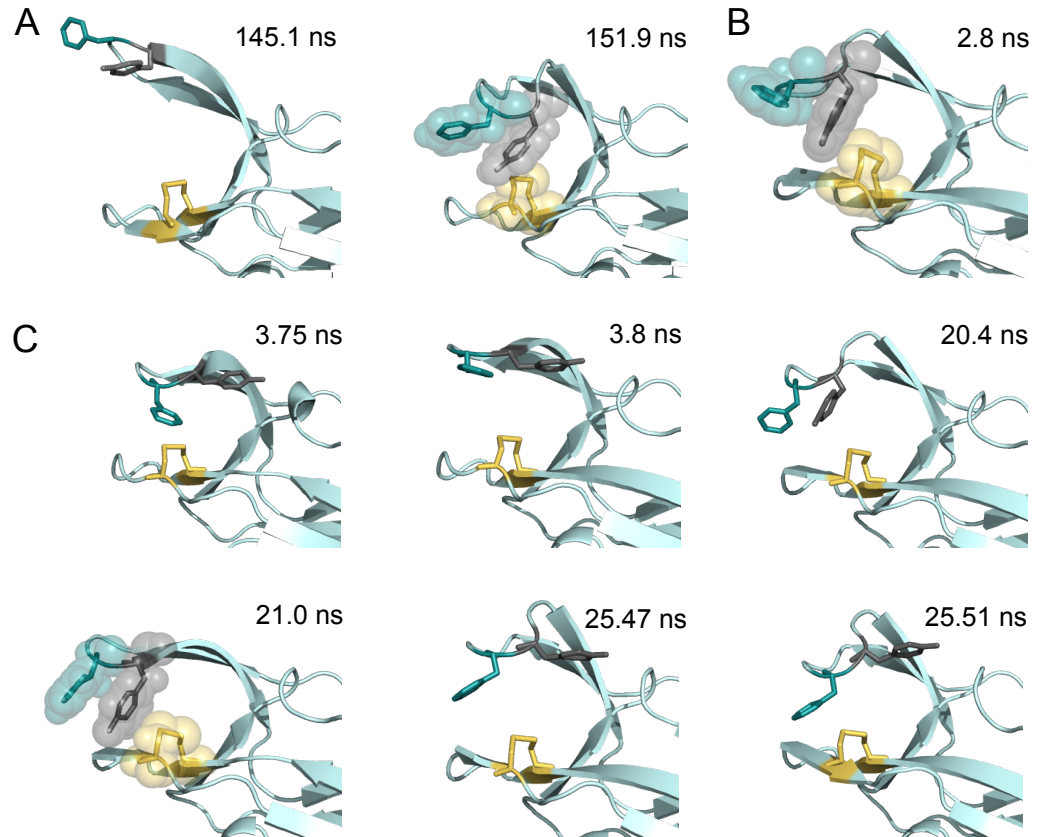

Figure 5 – figure supplement 5

Supplement: supp [file elife-54661-supp-v1.zip]

A

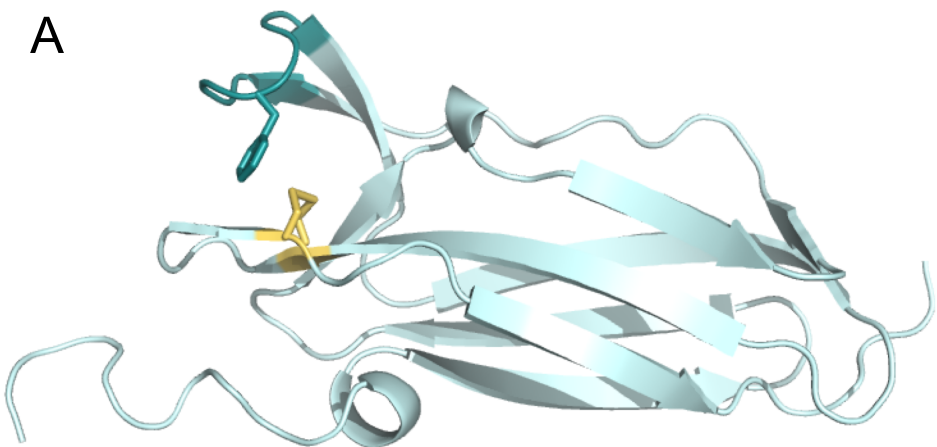

WT-nDsbD<sub>ox</sub>

B

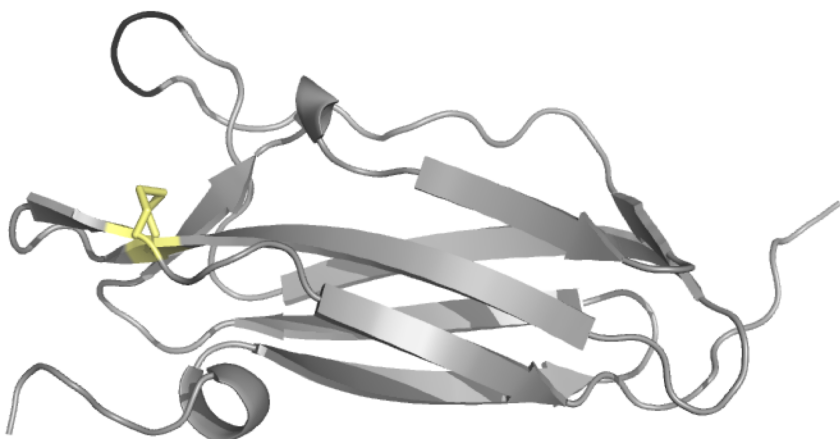

$\Delta$ loop-nDsbD<sub>ox</sub>

C

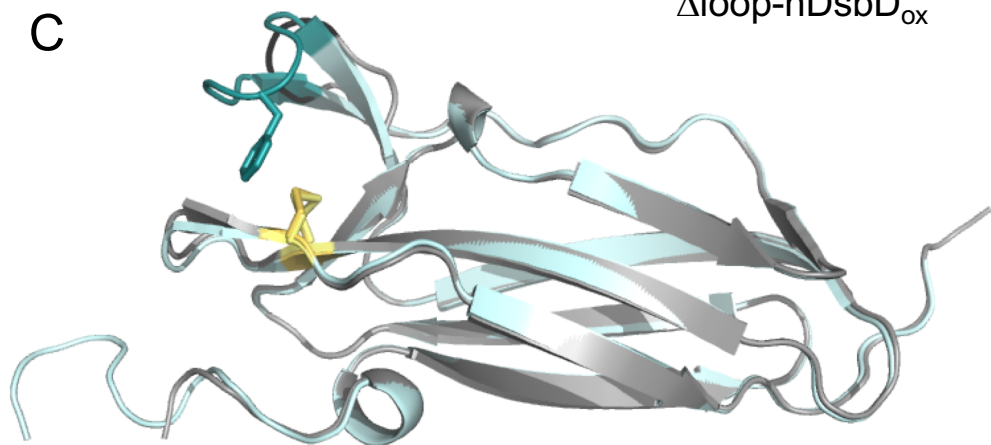

overlay

Figure 6 – figure supplement 2

Supplement: supp [file elife-54661-supp-v1.zip]

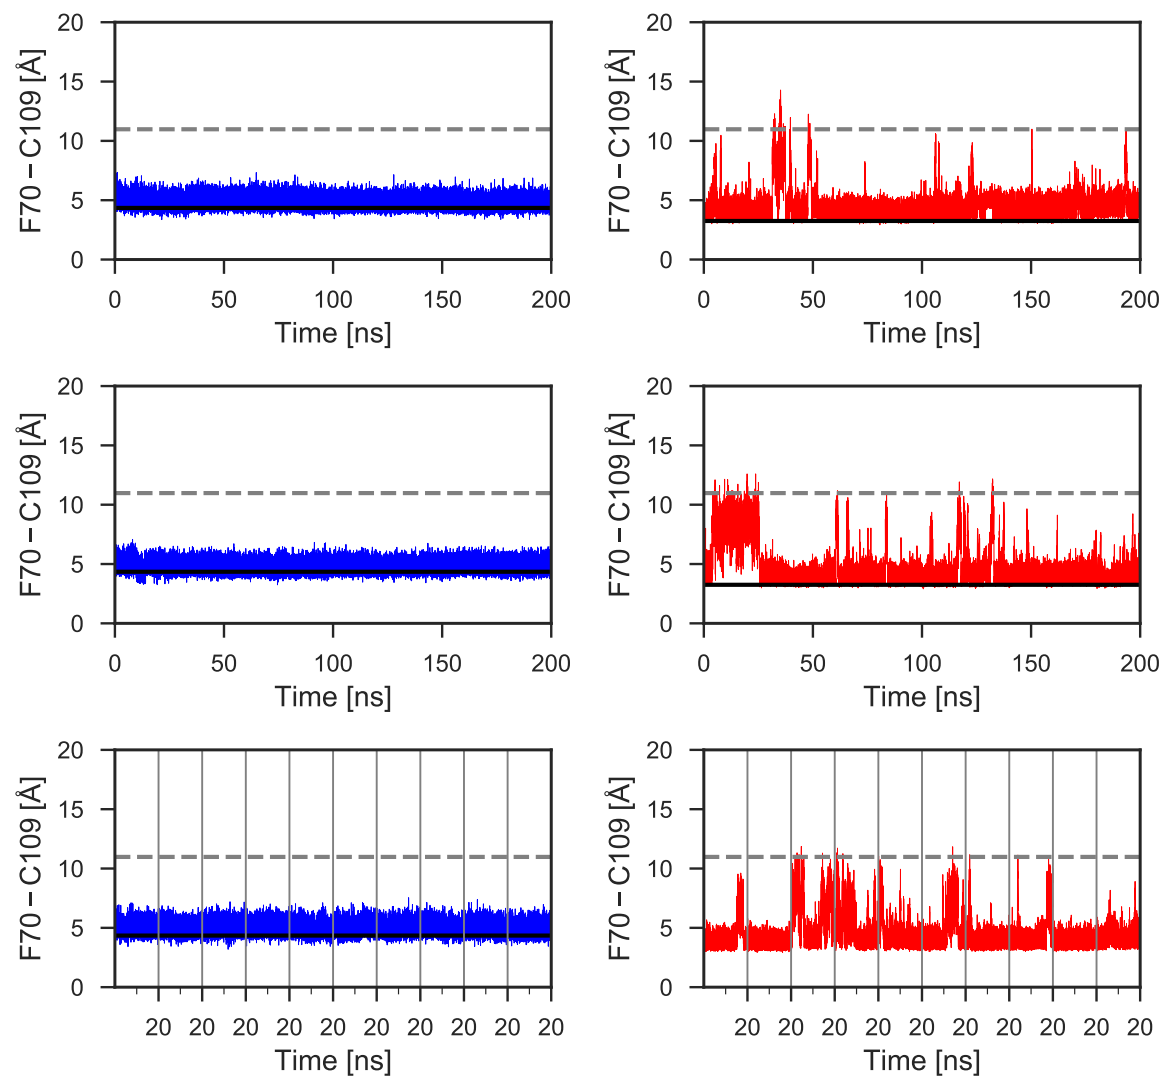

Figure 3 – figure supplement 2

Supplement: supp [file elife-54661-supp-v1.zip]

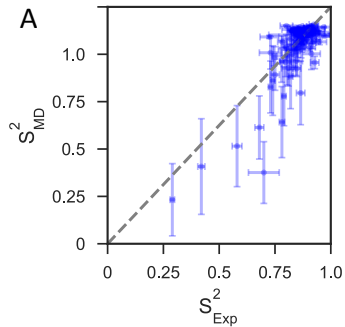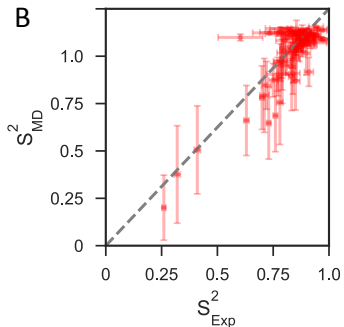

Figure 2 – figure supplement 3

Supplement: supp [file elife-54661-supp-v1.zip]

A

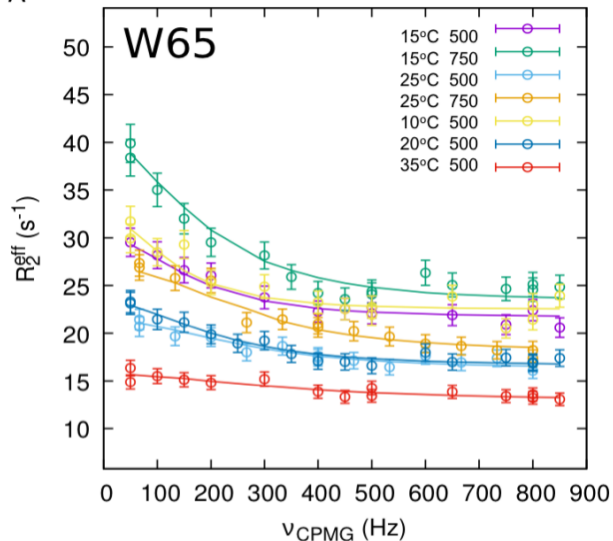

B

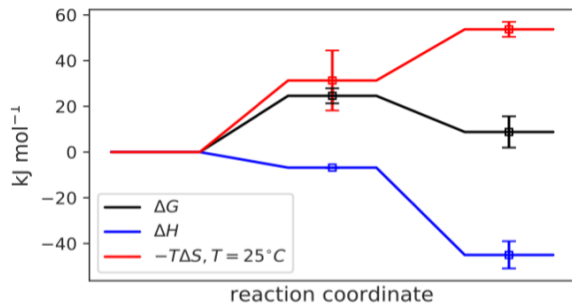

Figure 6 – figure supplement 1

Supplement: supp [file elife-54661-supp-v1.zip]

A

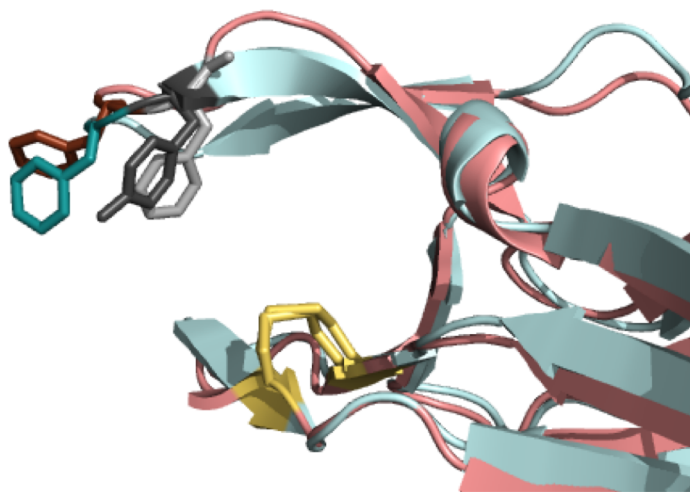

B

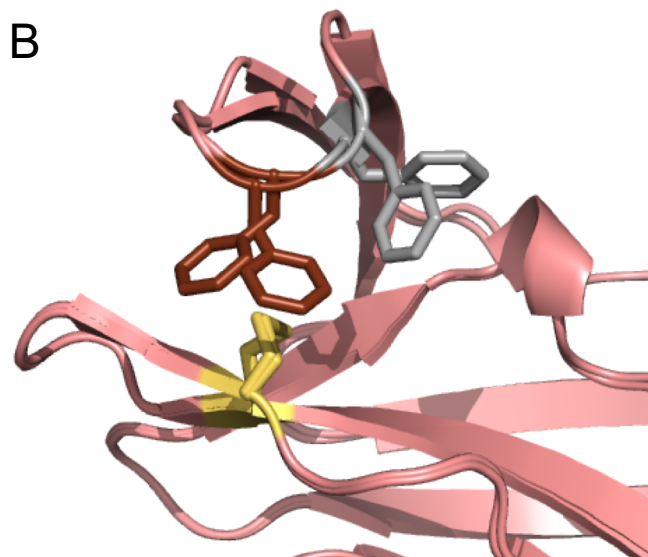

C

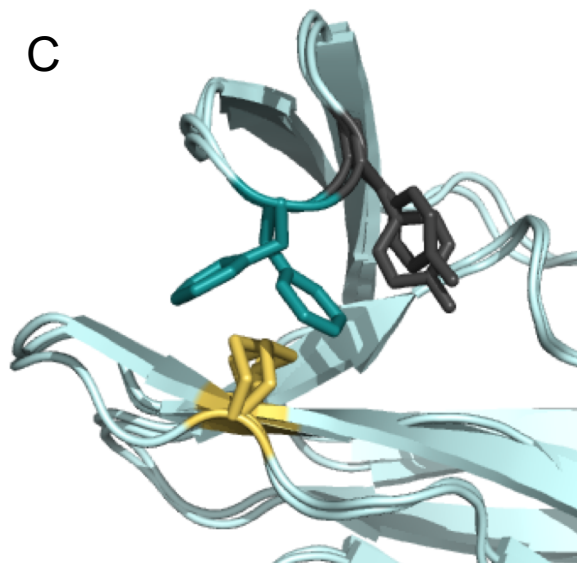

Figure 4 – figure supplement 2

Supplement: supp [file elife-54661-supp-v1.zip]

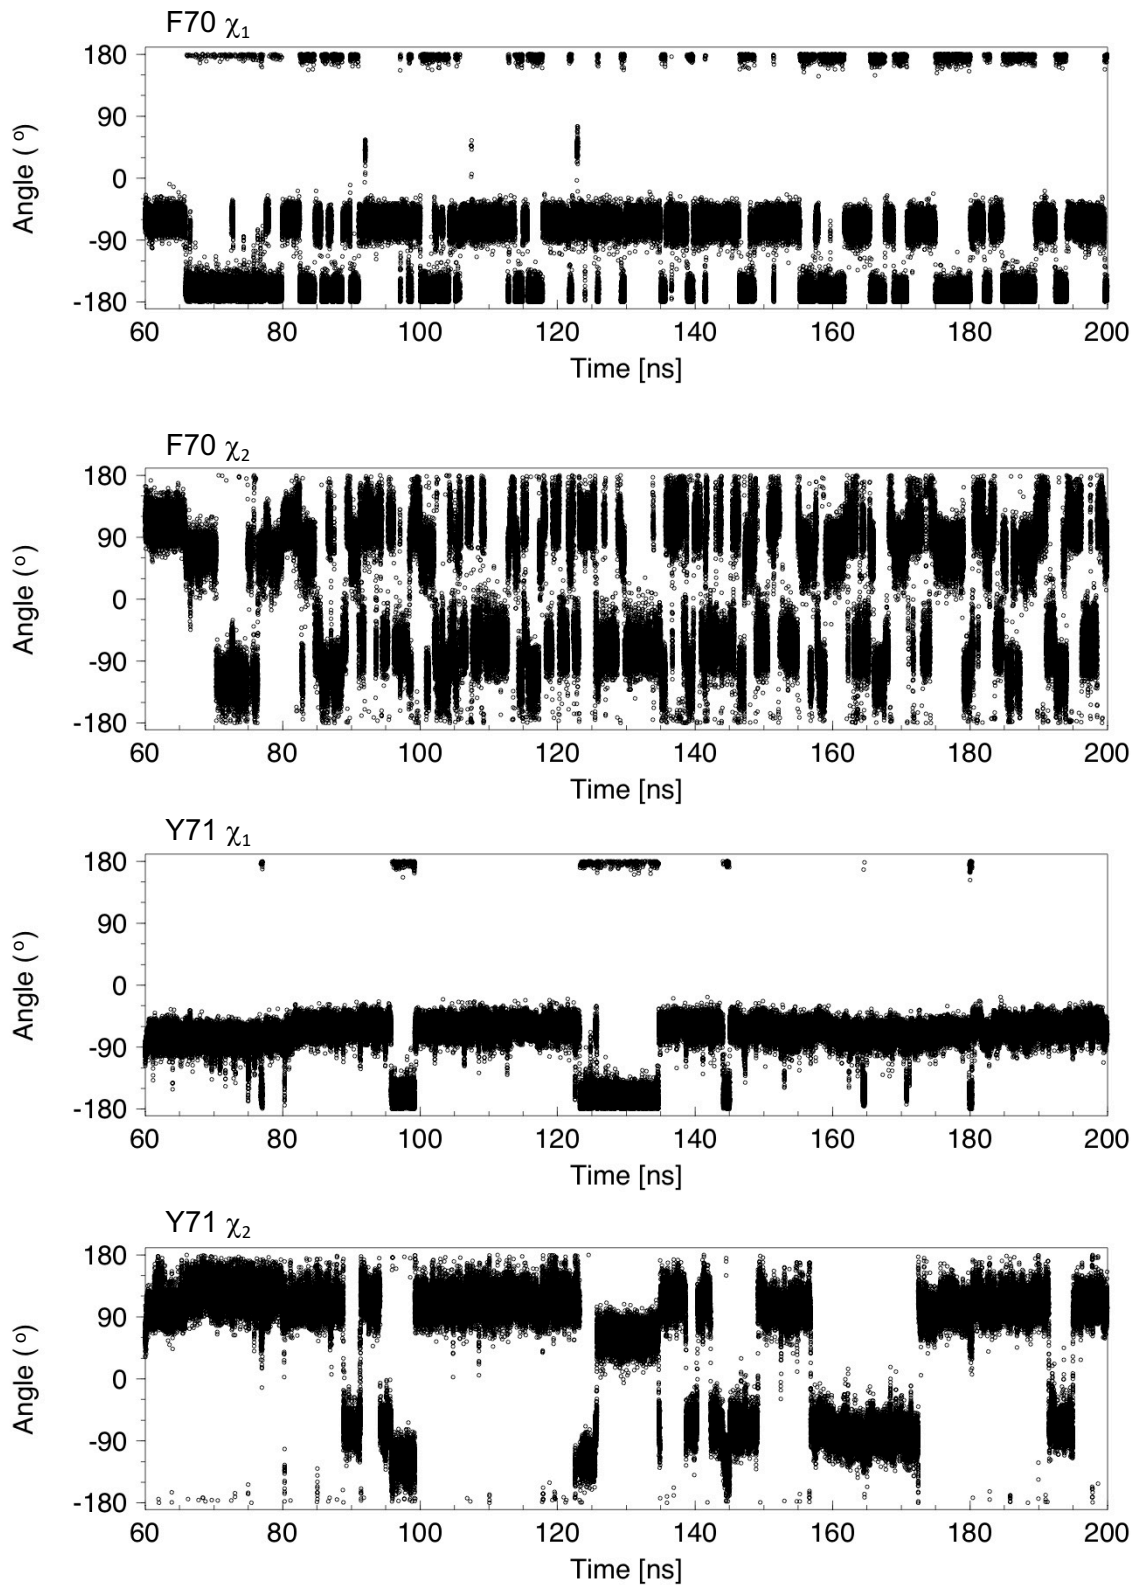

Figure 5 – figure supplement 2

Supplement: supp [file elife-54661-supp-v1.zip]

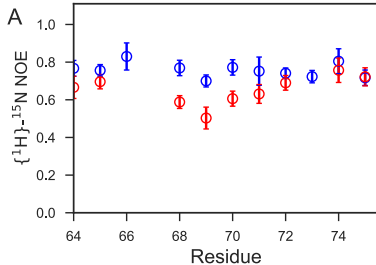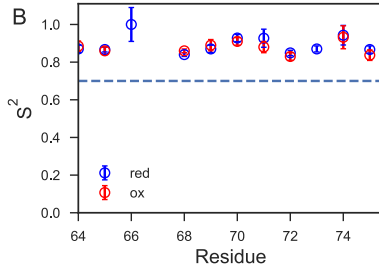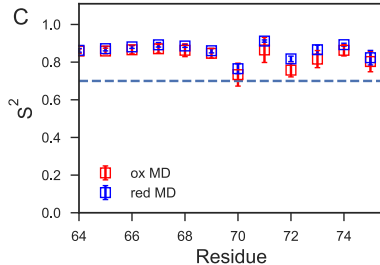

Figure 2 – figure supplement 2

Supplement: supp [file elife-54661-supp-v1.zip]

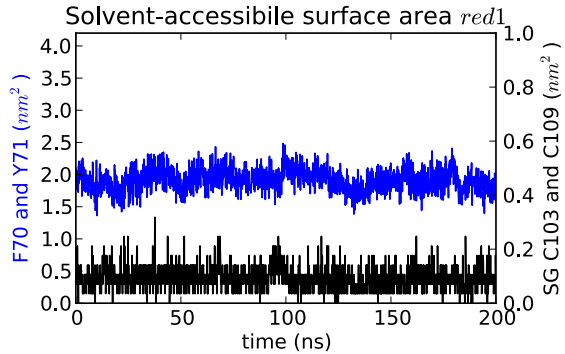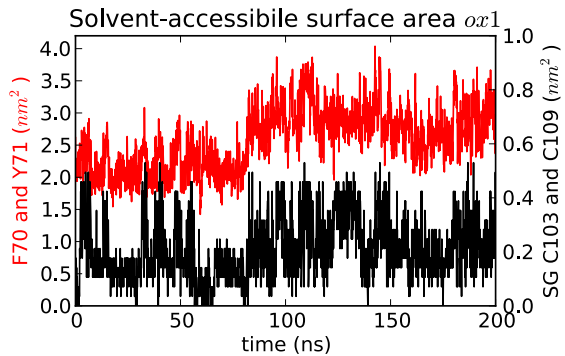

Figure 3 – figure supplement 1

Supplement: supp [file elife-54661-supp-v1.zip]

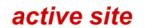

Figure 5 – figure supplement 6

Supplement: supp [file elife-54661-supp-v1.zip]

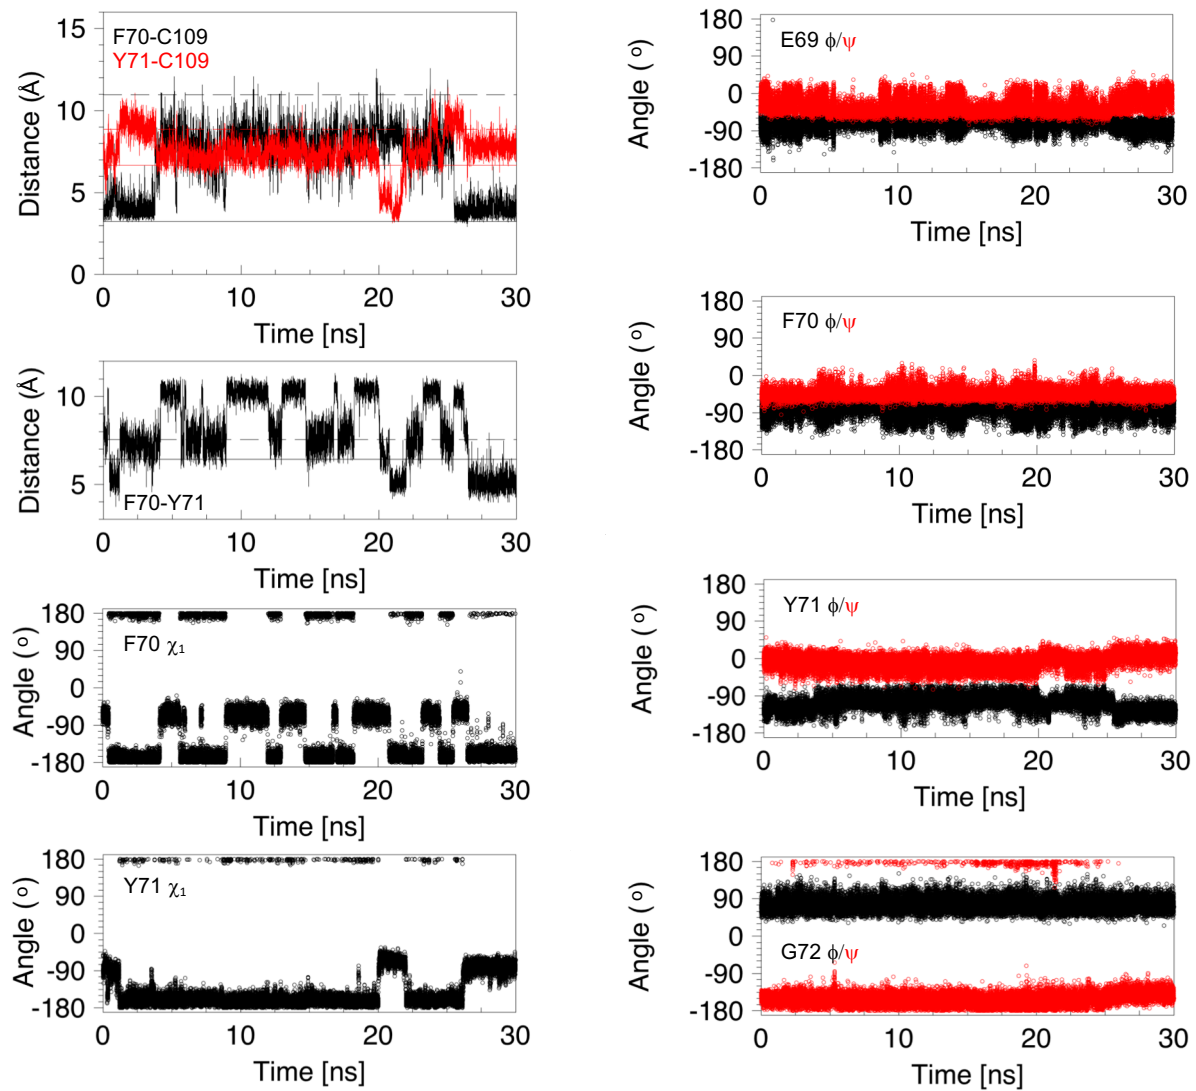

Figure 5 – figure supplement 4

Supplement: supp [file elife-54661-supp-v1.zip]

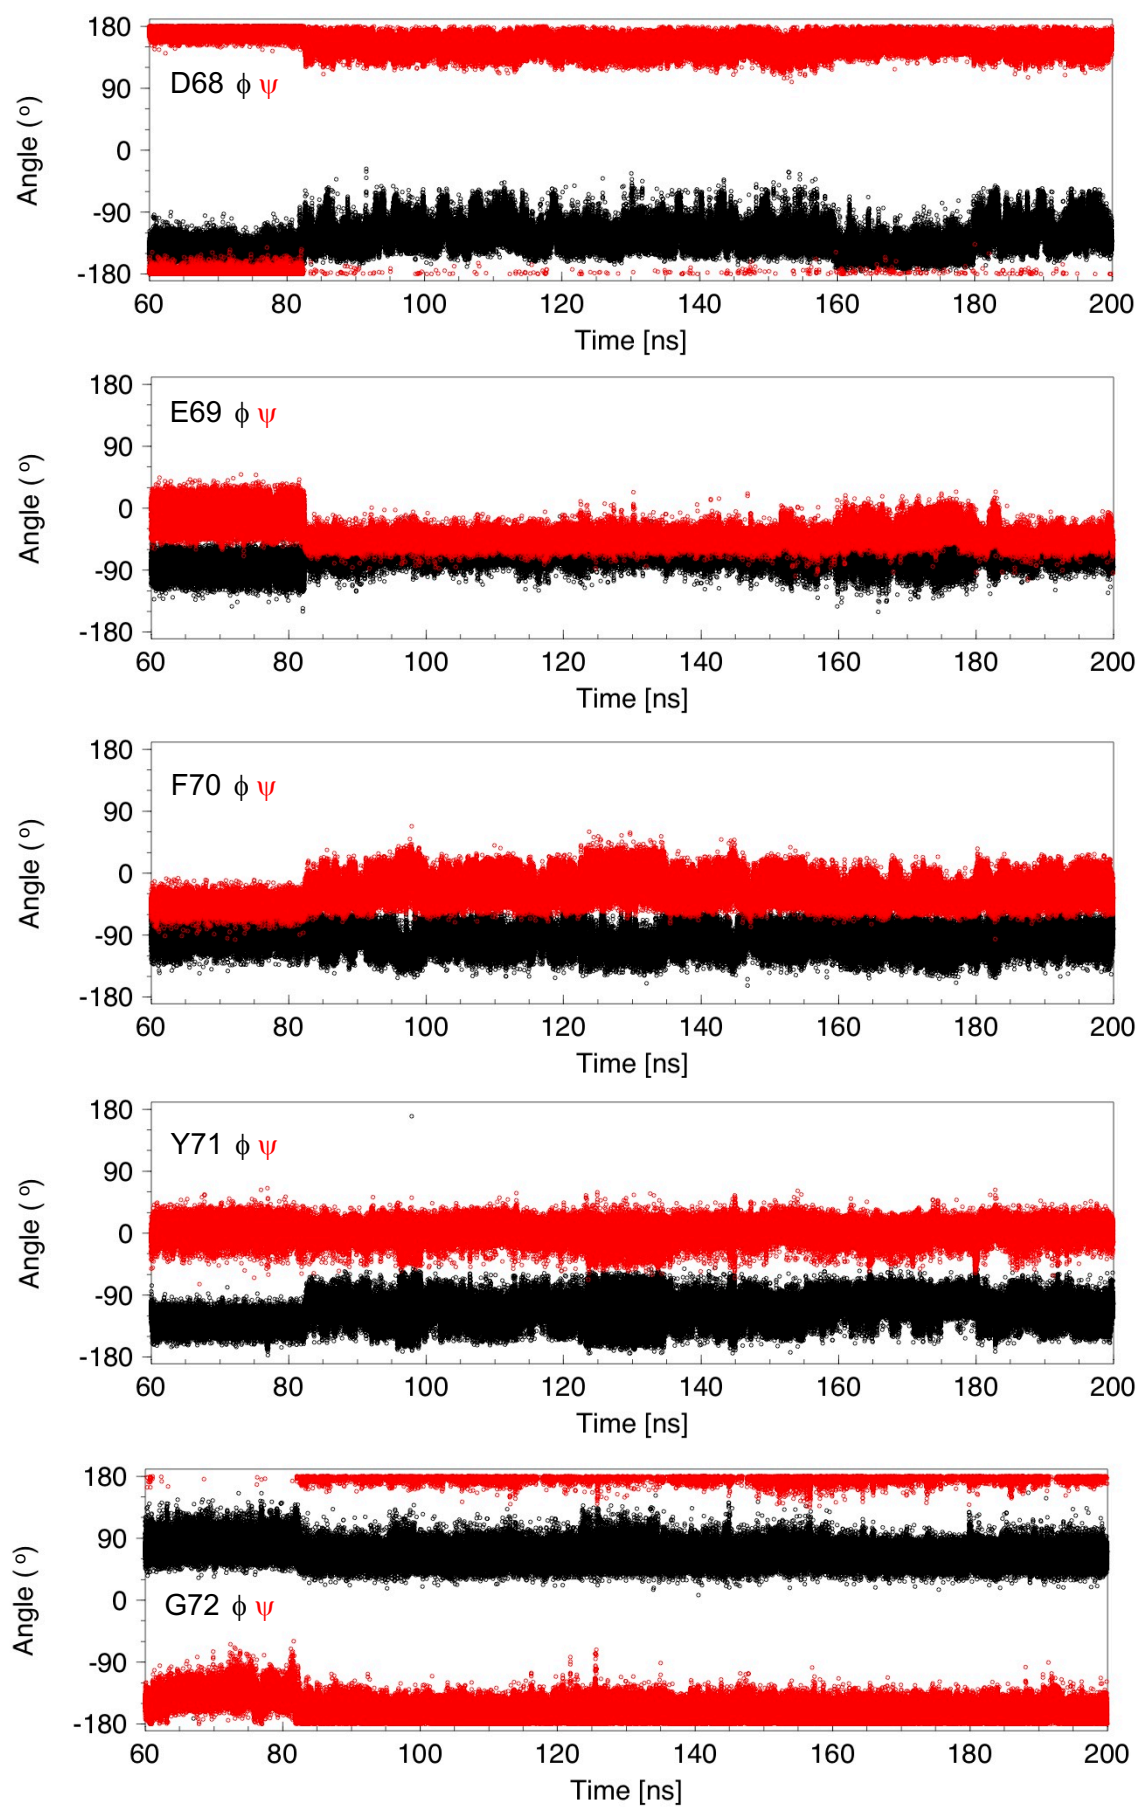

Figure 5 – figure supplement 3

Supplement: supp [file elife-54661-supp-v1.zip]

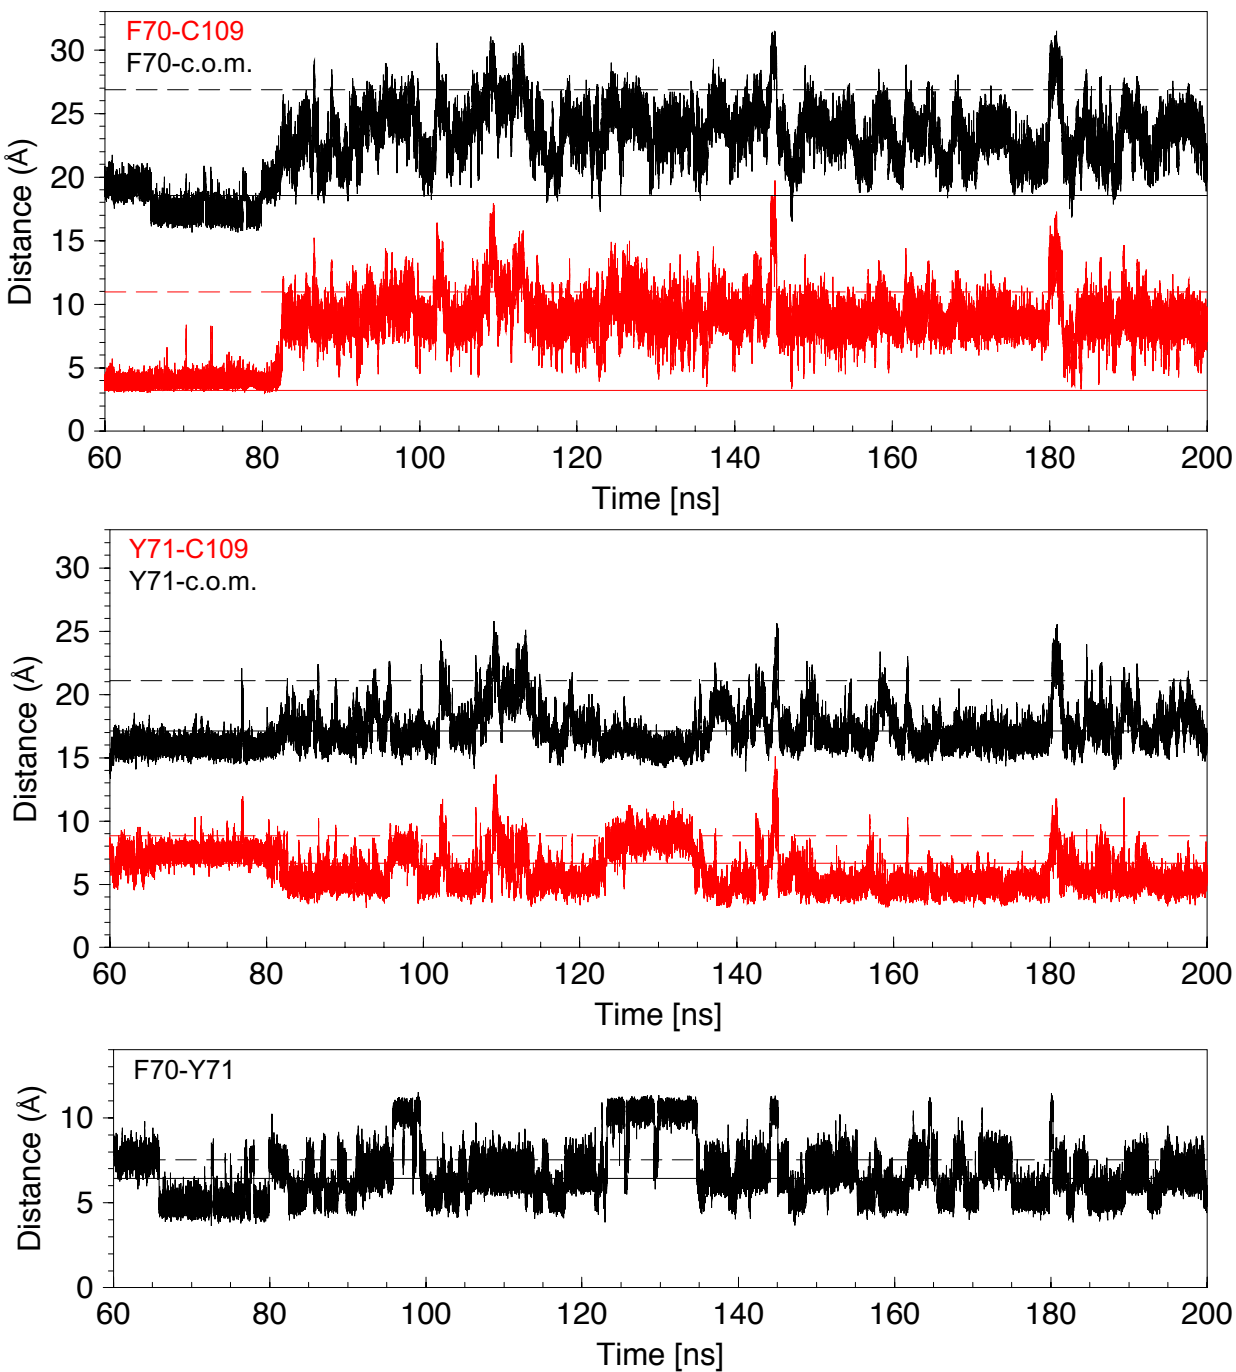

Figure 5 – figure supplement 1

Supplement: supp [file elife-54661-supp-v1.zip]

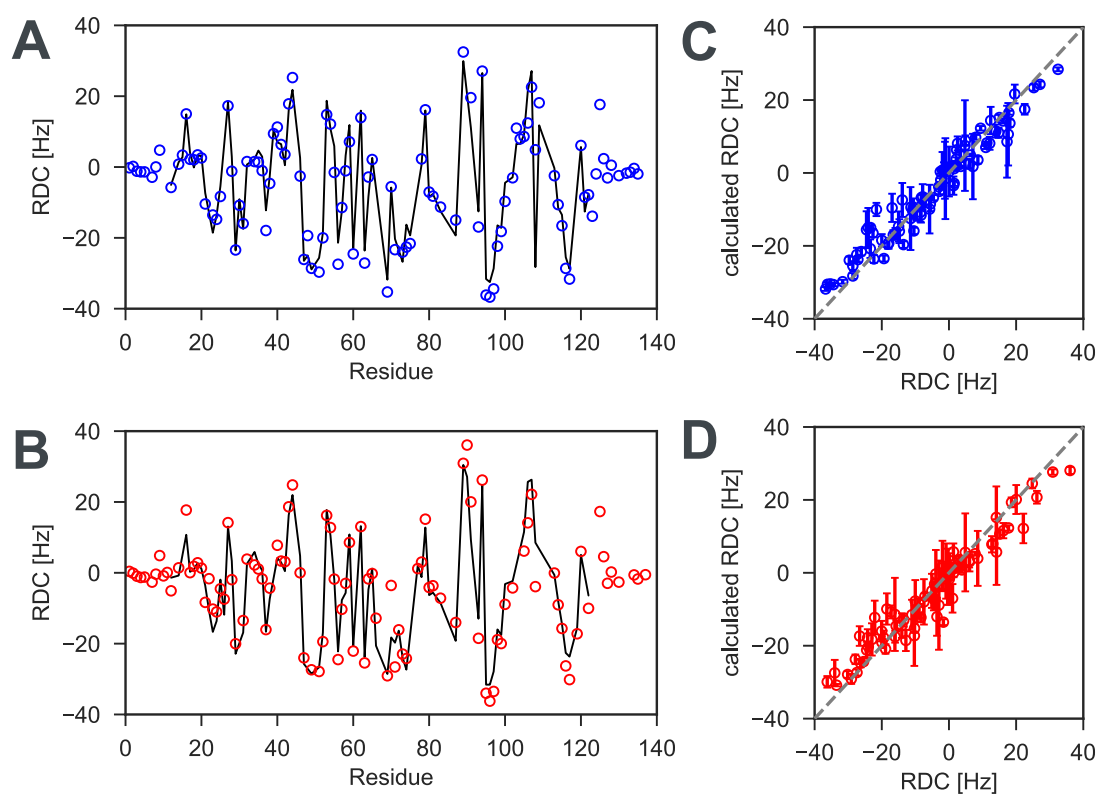

Figure 2 – figure supplement 1

Supplement: supp [file elife-54661-supp-v1.zip › elife_poa_e54661_Figure_2_figure_supplement_1.pdf]
